# Supplementary material for: Mendelian randomization study of birth weight and risk of psychiatric disorders later in life
Source: bioRxiv or medRxiv preprint supplement (doi:10.1101/2023.10.26.23297618), 2023-10-26
Supplement: Supplementary file [file media-1.pdf]

## Supplementary Information

### Mendelian randomization study of birth weight and risk of psychiatric disorders later in life

Xiaoping Wu<sup>1,2</sup>, Frank Geller<sup>1,2</sup>, Dorte Helenius<sup>3,4</sup>, Jakob Grove<sup>3,5,6,7</sup>, Clara Albiñana<sup>8</sup>, Liselotte Vogdrup Petersen<sup>3,8</sup>, Cynthia M. Bulik<sup>9,10,11</sup>, Anders D. Børglum<sup>3,5,7</sup>, Thomas Werge<sup>3,4,12</sup>, Bjarni J. Vilhjálmsson<sup>6,8,13</sup>, Bjarke Feenstra<sup>1,2,14</sup>

<sup>1</sup>Department of Epidemiology Research, Statens Serum Institut, Copenhagen, Denmark

<sup>2</sup>Copenhagen University Hospital Biobank Unit, Department of Clinical Immunology, Rigshospitalet, Copenhagen, Denmark

<sup>3</sup>iPSYCH, The Lundbeck Foundation Initiative for Integrative Psychiatric Research, Aarhus, Denmark

<sup>4</sup>Institute of Biological Psychiatry, Mental Health Services, Copenhagen University Hospital, Copenhagen, Denmark

<sup>5</sup>Department of Biomedicine – Human Genetics, Aarhus University, Aarhus, Denmark

<sup>6</sup>Bioinformatics Research Centre, Aarhus University, Aarhus, Denmark

<sup>7</sup>Center for Genomics and Personalized Medicine, Aarhus, Denmark

<sup>8</sup>The National Centre for Register-based Research, Aarhus University, Aarhus, Denmark

<sup>9</sup>Department of Psychiatry, University of North Carolina at Chapel Hill, Chapel Hill, USA

<sup>10</sup>Department of Medical Epidemiology and Biostatistics, Karolinska Institutet, Stockholm, Sweden

<sup>11</sup>Department of Nutrition, University of North Carolina at Chapel Hill, Chapel Hill, USA

<sup>12</sup>Department of Clinical Medicine, University of Copenhagen, Copenhagen, Denmark

<sup>13</sup>Novo Nordisk Foundation Center for Genomic Mechanisms of Disease, the Broad Institute of MIT and Harvard, Cambridge, MA, USA.

<sup>14</sup>Department of Biology, University of Copenhagen, Copenhagen, Denmark

## Supplementary Tables

**Supplementary Table 1. Descriptive statistics for the six psychiatric disorders and the common controls.**

| Disorder                | Sample size |        |       | Birth weight [mean (sd)], grams |               |               | Gestational age [mean (sd)], weeks |               |               | Year of birth (range) |
|-------------------------|-------------|--------|-------|---------------------------------|---------------|---------------|------------------------------------|---------------|---------------|-----------------------|
|                         | Male        | Female | All   | Male                            | Female        | All           | Male                               | Female        | All           |                       |
| <b>ADHD</b>             | 14225       | 6046   | 20271 | 3571<br>(531)                   | 3423<br>(507) | 3526<br>(528) | 39.7<br>(1.3)                      | 39.7<br>(1.3) | 39.7<br>(1.3) | 1981-2008             |
| <b>Schizophrenia</b>    | 2202        | 1844   | 4046  | 3540<br>(518)                   | 3434<br>(493) | 3492<br>(509) | 39.8<br>(1.2)                      | 39.8<br>(1.2) | 39.8<br>(1.2) | 1981-2004             |
| <b>ASD</b>              | 13071       | 4237   | 17308 | 3620<br>(536)                   | 3479<br>(516) | 3586<br>(535) | 39.8<br>(1.3)                      | 39.8<br>(1.3) | 39.8<br>(1.3) | 1981-2008             |
| <b>Major depression</b> | 8459        | 17510  | 25969 | 3569<br>(512)                   | 3433<br>(488) | 3477<br>(500) | 39.8<br>(1.2)                      | 39.8<br>(1.2) | 39.8<br>(1.2) | 1981-2005             |
| <b>Bipolar</b>          | 974         | 1669   | 2643  | 3575<br>(479)                   | 3443<br>(478) | 3491<br>(483) | 39.8<br>(1.2)                      | 39.9<br>(1.2) | 39.9<br>(1.2) | 1981-2003             |
| <b>Anorexia nervosa</b> | 331         | 4353   | 4684  | 3610<br>(512)                   | 3477<br>(480) | 3487<br>(484) | 39.7<br>(1.2)                      | 39.8<br>(1.2) | 39.8<br>(1.2) | 1981-2008             |
| <b>Control</b>          | 16668       | 16167  | 32835 | 3628<br>(498)                   | 3496<br>(482) | 3563<br>(495) | 39.8<br>(1.3)                      | 39.8<br>(1.3) | 39.8<br>(1.3) | 1981-2008             |

Abbreviations: ASD, autism spectrum; ADHD, attention deficit/hyperactivity disorder.

**Supplementary Table 2. Number of overlapping individuals among 6 psychiatric disorders.**

| Disorders               | ADHD  | Schizophrenia | ASD   | Major depression | Bipolar disorder | Anorexia nervosa |
|-------------------------|-------|---------------|-------|------------------|------------------|------------------|
| <b>ADHD</b>             | 20271 | 424           | 3606  | 2093             | 349              | 165              |
| <b>Schizophrenia</b>    | 424   | 4046          | 338   | 1229             | 178              | 113              |
| <b>ASD</b>              | 3606  | 338           | 17308 | 1810             | 128              | 219              |
| <b>Major depression</b> | 2093  | 1229          | 1810  | 25969            | 0                | 1190             |
| <b>Bipolar disorder</b> | 349   | 178           | 128   | 0                | 2643             | 69               |
| <b>Anorexia nervosa</b> | 165   | 113           | 219   | 1190             | 69               | 4684             |

Abbreviations: ASD, autism spectrum; ADHD, attention deficit/hyperactivity disorder.

**Supplementary Table 3. List of the 86 SNPs used as instrumental variables.** The table lists the SNPs with their alleles and the observed allele frequencies in the iPSYCH study and indicates the available SNPs or proxy SNPs in the psychiatric disorder GWAS summary statistics.

| SNP         | CHR | POS       | a1 | a2 | Allele frequency | ASD | ADHD           | Schizophrenia | Major depression | Bipolar disorder | Anorexia nervosa* |
|-------------|-----|-----------|----|----|------------------|-----|----------------|---------------|------------------|------------------|-------------------|
| rs1011476   | 11  | 2299035   | G  | T  | 0.703            | YES | YES            | YES           | YES              | YES              | YES               |
| rs1012167   | 20  | 39159119  | T  | C  | 0.625            | YES | YES            | YES           | YES              | YES              | YES               |
| rs10173538  | 2   | 160569276 | C  | T  | 0.600            | YES | YES            | YES           | YES              | YES              | YES               |
| rs10181515  | 2   | 227019461 | C  | T  | 0.764            | YES | YES            | YES           | YES              | YES              | YES               |
| rs10265057  | 7   | 47275737  | A  | G  | 0.913            | YES | YES            | YES           | YES              | YES              | NO                |
| rs10414727  | 19  | 54205961  | T  | A  | 0.687            | YES | YES            | YES           | YES              | YES              | YES               |
| rs10495563  | 2   | 9662210   | G  | A  | 0.350            | YES | YES            | YES           | YES              | YES              | YES               |
| rs10913200  | 1   | 176521655 | G  | A  | 0.972            | YES | NO             | YES           | YES              | YES              | YES               |
| rs11042596  | 11  | 2118860   | T  | G  | 0.347            | YES | rs1104<br>2594 | YES           | YES              | YES              | YES               |
| rs11055030  | 12  | 12878349  | G  | C  | 0.742            | YES | YES            | YES           | YES              | YES              | YES               |
| rs11082304  | 18  | 20720973  | G  | T  | 0.493            | YES | YES            | YES           | YES              | YES              | YES               |
| rs1135856   | 22  | 46440605  | T  | C  | 0.715            | YES | NO             | YES           | YES              | YES              | YES               |
| rs116964396 | 8   | 41505849  | C  | A  | 0.964            | YES | YES            | YES           | YES              | YES              | YES               |
| rs11867479  | 17  | 68090207  | C  | T  | 0.646            | YES | YES            | YES           | YES              | YES              | YES               |
| rs1203876   | 20  | 22540915  | A  | C  | 0.950            | YES | YES            | YES           | YES              | YES              | YES               |
| rs12401656  | 1   | 43456767  | G  | A  | 0.880            | YES | YES            | YES           | YES              | YES              | YES               |
| rs12584892  | 13  | 73624534  | C  | T  | 0.822            | YES | YES            | YES           | YES              | YES              | YES               |
| rs12656216  | 5   | 36160668  | G  | A  | 0.240            | YES | YES            | YES           | YES              | YES              | YES               |
| rs1323438   | 9   | 119115531 | T  | C  | 0.293            | YES | YES            | YES           | YES              | YES              | YES               |
| rs13257363  | 8   | 142252580 | G  | A  | 0.597            | YES | YES            | YES           | YES              | YES              | YES               |
| rs13322435  | 3   | 156795468 | A  | G  | 0.577            | YES | YES            | YES           | YES              | YES              | YES               |
| rs1374204   | 2   | 46484205  | C  | T  | 0.297            | YES | YES            | YES           | NO               | YES              | YES               |
| rs138715366 | 7   | 44246271  | C  | T  | 0.990            | NO  | NO             | NO            | YES              | NO               | NO                |

|             |    |           |   |   |       |     |     |     |                 |     |     |
|-------------|----|-----------|---|---|-------|-----|-----|-----|-----------------|-----|-----|
| rs141845046 | 1  | 154987704 | C | T | 0.971 | YES | YES | YES | rs146564<br>277 | YES | YES |
| rs145775785 | 12 | 65902265  | C | T | 0.978 | YES | NO  | YES | YES             | YES | NO  |
| rs149567808 | 7  | 43637797  | C | T | 0.994 | NO  | NO  | NO  | YES             | NO  | NO  |
| rs2131354   | 4  | 145599908 | G | A | 0.465 | YES | YES | YES | YES             | YES | YES |
| rs220193    | 21 | 43581308  | A | G | 0.235 | YES | YES | YES | YES             | YES | YES |
| rs222857    | 17 | 7164563   | C | T | 0.421 | YES | YES | YES | YES             | YES | YES |
| rs2282978   | 7  | 92264410  | T | C | 0.661 | YES | YES | YES | YES             | YES | YES |
| rs2296528   | 20 | 57274151  | G | C | 0.365 | YES | YES | YES | YES             | YES | YES |
| rs231848    | 11 | 2735557   | A | G | 0.437 | YES | NO  | YES | YES             | YES | YES |
| rs234864    | 11 | 2857297   | G | A | 0.441 | YES | YES | YES | YES             | YES | YES |
| rs2529415   | 7  | 50736662  | C | T | 0.347 | YES | YES | YES | YES             | YES | YES |
| rs28378473  | 9  | 139245460 | T | C | 0.265 | YES | NO  | YES | YES             | YES | YES |
| rs28407694  | 8  | 66861738  | C | T | 0.655 | YES | YES | YES | YES             | YES | YES |
| rs28457693  | 9  | 98217348  | A | G | 0.872 | YES | YES | YES | YES             | YES | YES |
| rs28681372  | 22 | 50351977  | G | A | 0.404 | YES | NO  | YES | YES             | YES | NO  |
| rs2871865   | 15 | 99194896  | C | G | 0.902 | YES | YES | YES | YES             | YES | YES |
| rs2901307   | 10 | 124128443 | C | T | 0.526 | YES | YES | YES | YES             | YES | YES |
| rs2908279   | 7  | 44174857  | T | G | 0.499 | YES | YES | YES | YES             | YES | YES |
| rs2928148   | 15 | 41401550  | G | A | 0.459 | YES | YES | YES | YES             | YES | YES |
| rs2930973   | 11 | 69445969  | G | A | 0.497 | YES | YES | YES | YES             | YES | YES |
| rs2934844   | 6  | 166142456 | A | T | 0.307 | YES | YES | YES | YES             | YES | YES |
| rs34776209  | 7  | 23513093  | C | T | 0.773 | YES | YES | YES | YES             | YES | YES |
| rs35953885  | 2  | 43608902  | G | A | 0.751 | YES | YES | YES | YES             | YES | YES |
| rs3806315   | 1  | 214724668 | G | A | 0.408 | YES | YES | YES | YES             | YES | YES |
| rs3933326   | 9  | 123633948 | A | G | 0.346 | YES | YES | YES | YES             | YES | YES |
| rs41355649  | 19 | 33790556  | G | A | 0.951 | YES | NO  | YES | YES             | YES | YES |
| rs4444073   | 11 | 10331664  | A | C | 0.551 | YES | YES | YES | YES             | YES | YES |

|             |    |           |   |   |       |                |     |     |     |     |                |
|-------------|----|-----------|---|---|-------|----------------|-----|-----|-----|-----|----------------|
| rs4925109   | 17 | 17661802  | A | G | 0.320 | YES            | YES | YES | YES | YES | YES            |
| rs4953353   | 2  | 46567276  | G | T | 0.626 | YES            | YES | YES | YES | YES | YES            |
| rs516246    | 19 | 49206172  | C | T | 0.553 | YES            | YES | YES | YES | YES | YES            |
| rs55836809  | 13 | 28502874  | A | G | 0.789 | YES            | YES | YES | YES | YES | YES            |
| rs55958435  | 15 | 96852638  | A | G | 0.730 | YES            | YES | YES | YES | YES | YES            |
| rs56252704  | 13 | 33556228  | G | A | 0.844 | YES            | YES | YES | YES | YES | YES            |
| rs56711588  | 2  | 109201345 | C | T | 0.560 | YES            | YES | YES | YES | YES | YES            |
| rs5750561   | 22 | 38595260  | A | T | 0.392 | YES            | YES | YES | YES | YES | YES            |
| rs577204588 | 6  | 53021737  | T | C | 0.994 | NO             | NO  | NO  | NO  | NO  | NO             |
| rs6033062   | 20 | 11207419  | T | A | 0.545 | YES            | YES | YES | YES | YES | YES            |
| rs6104763   | 20 | 11500108  | G | A | 0.360 | YES            | YES | YES | YES | YES | YES            |
| rs6575803   | 14 | 101257755 | C | T | 0.888 | YES            | YES | YES | YES | YES | YES            |
| rs6930558   | 6  | 141878920 | G | T | 0.243 | YES            | YES | YES | YES | YES | YES            |
| rs7076938   | 10 | 115789375 | C | T | 0.255 | YES            | YES | YES | YES | YES | YES            |
| rs7205514   | 16 | 50271806  | T | G | 0.243 | rs3505<br>6091 | YES | YES | YES | YES | rs35056<br>091 |
| rs72737240  | 1  | 215387455 | T | C | 0.762 | YES            | YES | YES | YES | YES | YES            |
| rs72813918  | 5  | 158437823 | C | T | 0.874 | YES            | YES | YES | YES | YES | YES            |
| rs7354849   | 1  | 232765308 | A | G | 0.534 | YES            | YES | YES | YES | YES | YES            |
| rs7402983   | 15 | 99193276  | A | C | 0.406 | YES            | YES | YES | YES | YES | YES            |
| rs74465052  | 10 | 89605427  | T | A | 0.944 | YES            | YES | YES | YES | YES | YES            |
| rs74942620  | 8  | 57499986  | G | C | 0.731 | YES            | YES | YES | YES | YES | YES            |
| rs75104038  | 6  | 34190104  | G | A | 0.939 | YES            | YES | YES | YES | YES | YES            |
| rs753381    | 20 | 39797465  | T | C | 0.452 | YES            | YES | YES | YES | YES | YES            |
| rs7541039   | 1  | 214176779 | C | T | 0.742 | YES            | YES | YES | YES | YES | YES            |
| rs7563664   | 2  | 158344455 | G | T | 0.886 | YES            | YES | YES | YES | YES | YES            |
| rs76094073  | 6  | 109288036 | C | G | 0.881 | YES            | YES | YES | YES | YES | YES            |
| rs76895963  | 12 | 4384844   | T | G | 0.976 | NO             | NO  | YES | YES | YES | NO             |

|            |    |           |   |   |       |     |     |     |     |     |     |
|------------|----|-----------|---|---|-------|-----|-----|-----|-----|-----|-----|
| rs7744700  | 6  | 53349401  | T | A | 0.702 | YES | YES | YES | YES | YES | YES |
| rs7771453  | 6  | 35498632  | A | G | 0.781 | YES | YES | YES | YES | YES | YES |
| rs7968682  | 12 | 66371880  | G | T | 0.509 | YES | YES | YES | YES | YES | YES |
| rs80089232 | 7  | 73018816  | T | C | 0.935 | YES | YES | YES | YES | YES | YES |
| rs9366778  | 6  | 31269173  | G | A | 0.585 | YES | YES | YES | NO  | YES | YES |
| rs9379832  | 6  | 26186200  | A | G | 0.740 | YES | YES | YES | YES | YES | YES |
| rs962554   | 6  | 142734204 | T | C | 0.725 | YES | YES | YES | YES | YES | YES |
| rs9851257  | 3  | 123125711 | T | A | 0.752 | YES | YES | YES | YES | YES | YES |
| rs9855896  | 3  | 14287150  | A | G | 0.798 | YES | YES | YES | YES | YES | YES |

YES: instrumental SNP exists in GWAS summary statistics, NO: instrumental SNP does not exist in GWAS summary statistics, Others: proxy SNPs have  $r^2 > 0.8$  with the instrumental SNP. Abbreviations: ASD, autism spectrum; ADHD, attention deficit/hyperactivity disorder.

**Supplementary Table 4. Description of public GWAS summary statistics and results of heterogeneity tests.**

| Traits                  | No. of samples | No. cases | No. controls | Ancestry | Power (%) | Reference                   | Cochran's Q | Cochran's Q P value |
|-------------------------|----------------|-----------|--------------|----------|-----------|-----------------------------|-------------|---------------------|
| <b>Fetal BW</b>         | 423683         |           |              | European |           | Juliusdottir et al. 2021(1) |             |                     |
| <b>ASD</b>              | 46351          | 18382     | 27969        | European | 55        | Grove et al 2019 (2)        | 119.65      | 3.41E-03            |
| <b>ADHD</b>             | 225534         | 38691     | 186843       | European | 94        | Demontis et al 2023 (3)     | 109.24      | 4.85E-03            |
| <b>Schizophrenia</b>    | 127906         | 52017     | 75889        | European | 94        | Trubetskoy et al. (4)       | 281.06      | 1.29E-23            |
| <b>Bipolar</b>          | 413466         | 41917     | 371549       | European | 97        | Mullins et al. 2021 (5)     | 150.37      | 6.29E-06            |
| <b>Major depression</b> | 500199         | 170756    | 329443       | European | >99       | Howard et al. 2019 (6)      | 162.52      | 3.01E-07            |
| <b>Anorexia nervosa</b> | 72517          | 16992     | 55525        | European | 62        | Watson et al. 2019 (7)      | 129.15      | 1.84E-04            |

Abbreviation: BW, birth weight; ASD, autism spectrum; ADHD, attention deficit/hyperactivity disorder. The power calculations assume an odds ratio of 1.15 per SD change in exposure.

**Supplementary Table 5. MR-PRESSO analyses for fetal birth weight (exposure) and each psychiatric disorder (outcome).**

| Outcome                 | Global test pvalue | Outlier SNP                                                                                       | Distortion test pvalue |
|-------------------------|--------------------|---------------------------------------------------------------------------------------------------|------------------------|
| <b>ASD</b>              | 0.0048             | rs962554                                                                                          | 0.7350                 |
| <b>ADHD</b>             | 0.0050             |                                                                                                   |                        |
| <b>Major depression</b> | <2e-4              | rs1135856, rs28457693                                                                             | 0.2422                 |
| <b>Schizophrenia</b>    | <2e-4              | rs10173538, rs1374204, rs222857, rs28681372, rs4925109, rs516246, rs55958435, rs7541039, rs962554 | 0.9354                 |
| <b>Bipolar</b>          | <2e-4              | rs141845046, rs28378473                                                                           | 0.2062                 |
| <b>Anorexia nervosa</b> | 2e-4               | rs1012167, rs72813918                                                                             | 0.9058                 |

Abbreviation: ASD, autism spectrum; ADHD, attention deficit/hyperactivity disorder.

## Supplementary Figures

**Supplementary Figure 1. Polygenic score analyses.** Shown are associations between polygenic score deciles and standardized observed birth weight in the iPSYCH study. Black dots show associations for the subset of the population representative sample used as controls in iPSYCH, and blue dots show associations for cases of the six different psychiatric disorders.

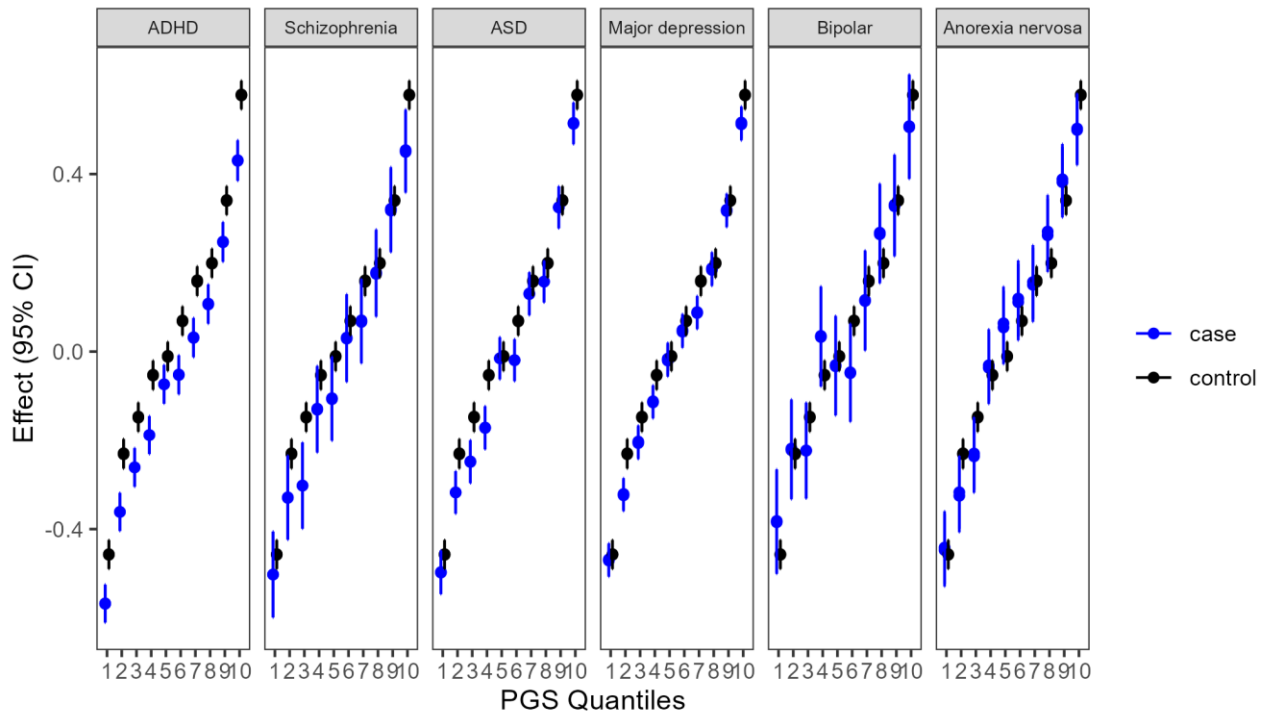

Abbreviations: CI, confidence interval; ASD, autism spectrum; ADHD, attention deficit/hyperactivity disorder.



**Supplementary Figure 2. Logistic regression of psychiatric disorders in the iPSYCH study on observed birth weight and polygenic score (PGS) of birth weight.** Analyses include maternal smoking during pregnancy, maternal mental health, and both maternal smoking during pregnancy and mental health as covariates.

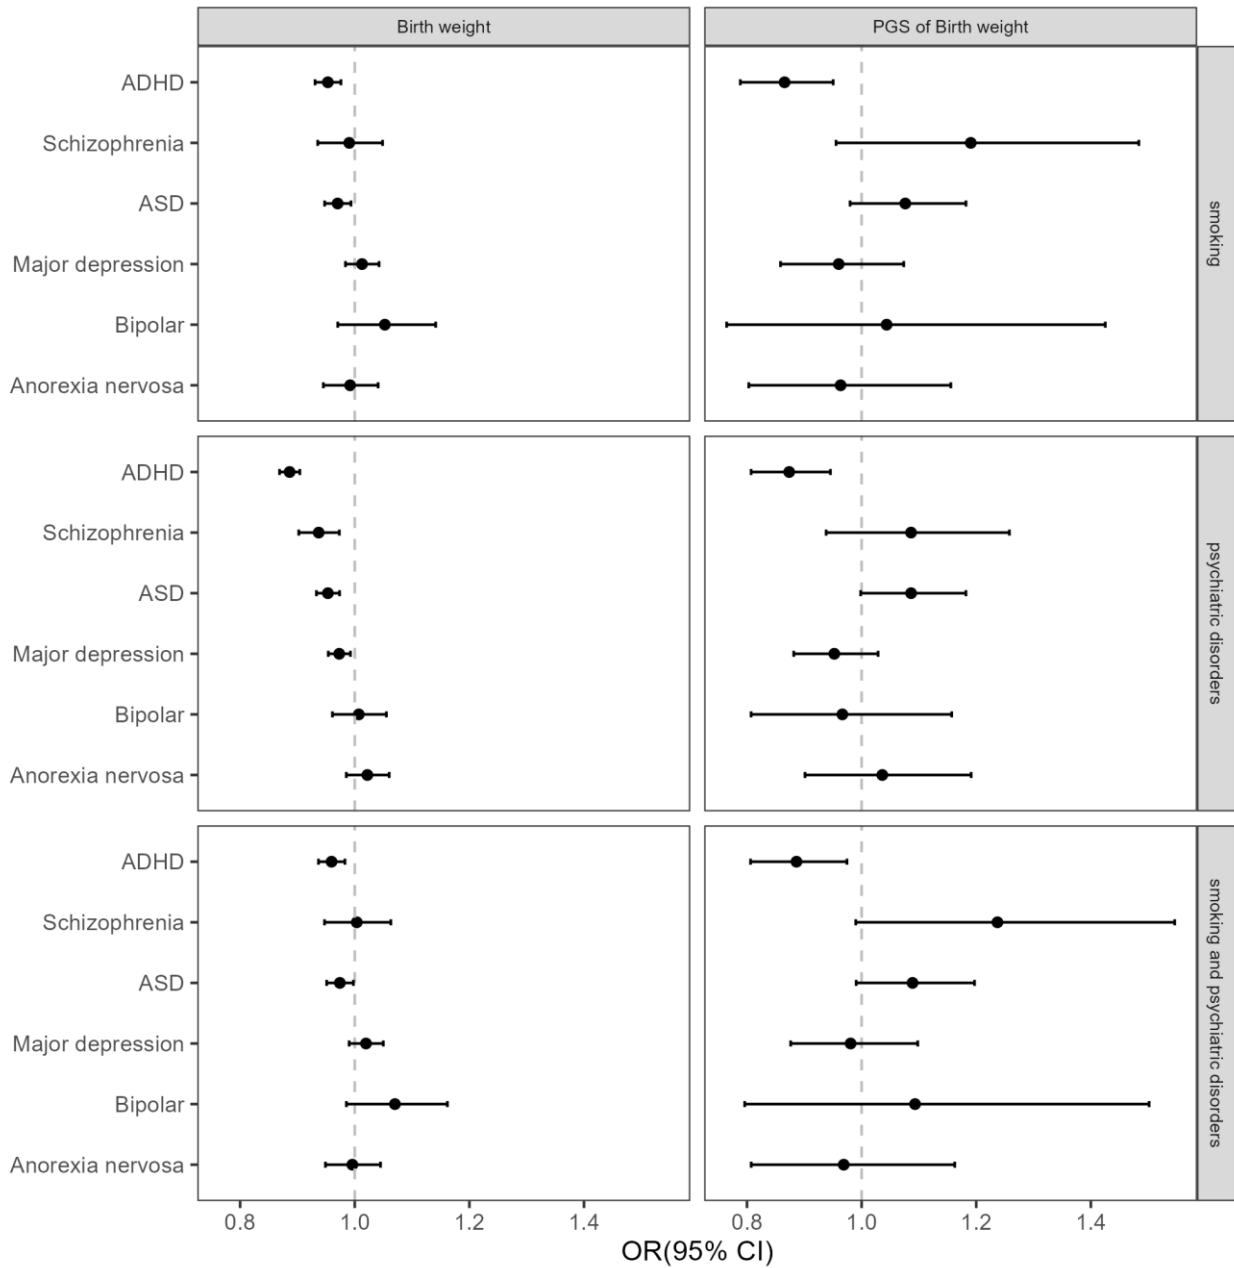

Abbreviations: CI, confidence interval; ASD, autism spectrum; ADHD, attention deficit/hyperactivity disorder.

## References

1. Juliusdottir T, Steinthorsdottir V, Stefansdottir L, Sveinbjornsson G, Ivarsdottir E V., Thorolfsson RB, *et al.* (2021): Distinction between the effects of parental and fetal genomes on fetal growth. *Nat Genet* 53: 1135–1142.
2. Grove J, Ripke S, Als TD, Mattheisen M, Walters RK, Børglum AD (2019): Identification of common genetic risk variants for autism spectrum disorder. *Nat Genet* 51: 431–44.
3. Demontis D, Walters GB, Athanasiadis G, Walters R, Therrien K, Nielsen TT, *et al.* (2023): Genome-wide analyses of ADHD identify 27 risk loci, refine the genetic architecture and implicate several cognitive domains. *Nat Genet*. Retrieved from <https://www.nature.com/articles/s41588-022-01285-8>
4. Trubetskoy V, Pardiñas AF, Qi T, Panagiotaropoulou G, Awasthi S, Bigdeli TB, *et al.* (2022): Mapping genomic loci implicates genes and synaptic biology in schizophrenia. *Nature* 604: 502–508.
5. Mullins N, Forstner AJ, O’Connell KS, Coombes B, Coleman JRI, Qiao Z, *et al.* (2021): Genome-wide association study of more than 40,000 bipolar disorder cases provides new insights into the underlying biology. *Nat Genet* 53: 817–829.
6. Howard DM, Adams MJ, Clarke T-K, Hafferty JD, Gibson J, Shirali M, *et al.* (2019): Genome-wide meta-analysis of depression identifies 102 independent variants and highlights the importance of the prefrontal brain regions. *Nat Neurosci* 22: 343–352.
7. Watson HJ, Yilmaz Z, Thornton LM, Hübel C, Coleman JRI, Gaspar HA, *et al.* (2019): Genome-wide association study identifies eight risk loci and implicates metabo-psychiatric origins for anorexia nervosa. *Nat Genet* 51: 1207–1214.
